# Supplementary material for: Prevention of DSS-induced colitis in mice with water kefir microbiotaviaanti-inflammatory and microbiota-balancing activity
Source: Royal Society of Chemistry journal article supplement (doi:10.1039/d3fo00354j), 2023-01-01
Supplement: d3fo00354j1.xlsx [file d3fo00354j1.xlsx]

## Sheet: Figure. S1
Fig. S1 The effect of water kefir microbiota on the treatment of enteritis. (a-b) Changes in body weight (a) and DAI score (b), respectively. (c) Representative images of colons from mice. (d-e) Statistical analysis of colon length (d) and spleen index (e) in each group, respectively. (f) Percent survival. (g)Representative images of HE stained colon tissue samples. (h) Histopathological scores o…

## Sheet: Figure. S2
NF-κB
GAPDH
Fig. S2 The raw images of WB analysis of Claudin 1, ZO-1, Occludin, and NF-κB p65 expression.

## Sheet: Figure. S3
	Fig. S3 The rarefaction curves based on the OTUs.

## Sheet: Table S1
Table S1. The DAI Scores
Score	Weight loss（%）	Stool properties	Stool bleeding
0	0-5	Normal	Negative blood stool
1	5-10	Soft stool	Small amount of blood
2	10-15	Dilute stool	Significant blood
3	15-20	Watery	Gross blood
4	>20	-	-

## Sheet: Table S2
Table S2. Histological Scoring
Score	Severity of inflammation	Depth of inflammatory involvement	Crypt damage
0	None	No inflammation	None
1	Slight	Mucosa	1/3 damaged
2	Middle	Mucosa and submucosa	2/3 damaged
3	Sever	Transmural	crypt total damaged
4	-	-	surface epithelium lost

## Sheet: Table S3
Table S3. Primer Sequences Used for qRT-PCR Analysis
Gene	Forward	Reverse
IL-10	GCTCTTACTGACTGGCATGAG	CGCAGCTCTAGGAGCATGTG
TNF-α	CAGGCGGTGCCTATGTCTC	CGATCACCCCGAAGTTCAGTAG
IL1β	GAAATGCCACCTTTTGACAGTG	TGGATGCTCTCATCAGGACAG
IL-6	CTGCAAGAGACTTCCATCCAG	AGTGGTATAGACAGGTCTGTTGG
TLR4	ATGGCATGGCTTACACCACC	GAGGCCAATTTTGTCTCCACA
NF-κBp65	TGCGATTCCGCTATAAATGCG	ACAAGTTCATGTGGATGAGGC
MyD88	TCATGTTCTCCATACCCTTGGT	AAACTGCGAGTGGGGTCAG
Cox-2	CCCATTAGCAGCCAGTTGTC	CAGGATGCAGTGCTGAGTTC
iNOS	GTTCTCAGCCCAACAATACAAGA	GTGGACGGGTCGATGTCAC

## Sheet: Table S4
Table S4. Analysis of KEGG pathways.	DSS vs NC																						DSS vs DSS+H-kefir
	Freq1(DSS)	Freq2(NC)	pValue	qValue	Difference between means	95% lower CI	95% upper CI	DSS							NC								Freq1(DSS)	Freq2(DSS-H-kefir)	pValue	qValue	Difference between means	95% lower CI	95% upper CI	DSS							DSS+H-kefir
Bacterial invasion of epithelial cells	0.0193201	0.00158966	1.60314e-06	0.000206805	0.0177305	0.0140577	0.0214032	0.0162597	0.0214671	0.0150935	0.0187978	0.0235815	0.0207212		0.00250147	0.00593986	0.000253391	3.84e-05	0.000790344	1.45e-05			0.0193201	0.0100256	0.0317763	0.368075	0.0092945	0.00109239	0.0174966	0.0162597	0.0214671	0.0150935	0.0187978	0.0235815	0.0207212		0.0186736	0.00162261	0.0133891	0.00792149	0.000922071	0.0176249	0.0100256
Polycyclic aromatic hydrocarbon degradation	0.0595424	0.137693	0.000350397	0.00452012	-0.0781503	-0.107742	-0.0485583	0.0779385	0.048259	0.0733253	0.0644986	0.0486791	0.0445537		0.144428	0.0909882	0.159084	0.120399	0.165075	0.146181			0.0595424	0.10114	0.0348793	0.285189	-0.0415974	-0.0792019	-0.00399292	0.0779385	0.048259	0.0733253	0.0644986	0.0486791	0.0445537		0.0636573	0.142185	0.0876971	0.135755	0.116956	0.0605886	0.10114
Protein folding and associated processing	0.751334	0.639543	0.00061528	0.00721556	0.111791	0.0646199	0.158962	0.741186	0.778539	0.710921	0.744493	0.761444	0.771424		0.681948	0.680321	0.624096	0.616325	0.571239	0.66333			0.751334	0.681366	0.0440143	0.207389	0.0699684	0.00253737	0.137399	0.741186	0.778539	0.710921	0.744493	0.761444	0.771424		0.744439	0.622695	0.704356	0.672921	0.593395	0.75039	0.681366
Replication, recombination and repair proteins	1.03353	0.684291	0.00108631	0.0107795	0.349237	0.178667	0.519808	0.992549	1.0047	0.914179	0.932878	1.30676	1.05011		0.680049	0.724081	0.57589	0.885104	0.546816	0.693806			1.03353	0.839096	0.0305476	0.404392	0.194433	0.022403	0.366463	0.992549	1.0047	0.914179	0.932878	1.30676	1.05011		0.931448	0.68597	0.862988	0.816412	0.725423	1.01233	0.839096
Ubiquitin system	0.0218065	0.0073677	0.00216798	0.0199764	0.0144388	0.0071286	0.021749	0.018859	0.0232197	0.0173314	0.0216144	0.0266021	0.0232122		0.00905323	0.0200509	0.00183004	0.00752927	0.00311289	0.00262984			0.0218065	0.0137478	0.0406661	0.230718	0.00805868	0.000451625	0.0156657	0.018859	0.0232197	0.0173314	0.0216144	0.0266021	0.0232122		0.0217839	0.00549298	0.0167735	0.0124169	0.00554668	0.0204728	0.0137478
Inorganic ion transport and metabolism	0.460262	0.248094	0.00313497	0.0224673	0.212168	0.102304	0.322033	0.42296	0.488682	0.41211	0.457553	0.490061	0.490204		0.247664	0.45572	0.19577	0.175724	0.219745	0.19394			0.460262	0.319473	0.0277067	0.481403	0.140789	0.0216096	0.259968	0.42296	0.488682	0.41211	0.457553	0.490061	0.490204		0.438309	0.194509	0.375306	0.280295	0.191287	0.43713	0.319473
African trypanosomiasis	0.0213347	0.00794148	0.00317454	0.0204758	0.0133932	0.00644643	0.0203399	0.0226339	0.0236306	0.0179186	0.0205907	0.0199619	0.0232722		0.00820506	0.0205955	0.00213411	0.00792879	0.00413597	0.00464944			0.0213347	0.0122673	0.0292847	0.452287	0.00906739	0.00128268	0.0168521	0.0226339	0.0236306	0.0179186	0.0205907	0.0199619	0.0232722		0.0195752	0.00406706	0.0157576	0.0133345	0.00220536	0.0186638	0.0122673
Caprolactam degradation	0.181441	0.0948774	0.0032916	0.0193007	0.0865636	0.0406615	0.132466	0.186453	0.199254	0.15667	0.193244	0.165057	0.187968		0.0922839	0.164226	0.0931521	0.0647287	0.117272	0.0376024			0.181441	0.123528	0.038597	0.23326	0.0579125	0.00420006	0.111625	0.186453	0.199254	0.15667	0.193244	0.165057	0.187968		0.180727	0.0785946	0.157045	0.126239	0.0467404	0.151824	0.123528
Nitrotoluene degradation	0.0973574	0.0479311	0.00329453	0.018478	0.0494263	0.0243623	0.0744903	0.0929566	0.099474	0.0935373	0.0919777	0.106687	0.0995113		0.0336131	0.0720701	0.0385942	0.0817618	0.0193901	0.0421574			0.0973574	0.0682348	0.00621674	0.864127	0.0291226	0.0117362	0.0465089	0.0929566	0.099474	0.0935373	0.0919777	0.106687	0.0995113		0.0852415	0.0475824	0.0663407	0.0725147	0.0510561	0.0866737	0.0682348
Vibrio cholerae pathogenic cycle	0.131894	0.0808739	0.00457981	0.0210998	0.0510202	0.022477	0.0795634	0.118271	0.140136	0.124533	0.132431	0.133473	0.142521		0.0759537	0.127526	0.0787708	0.0495626	0.0922181	0.0612128			0.131894	0.0998344	0.046409	0.204789	0.0320597	0.000706968	0.0634125	0.118271	0.140136	0.124533	0.132431	0.133473	0.142521		0.132313	0.0742255	0.121398	0.0774821	0.0669357	0.126652	0.0998344
Tropane, piperidine and pyridine alkaloid biosynthesis	0.141189	0.113281	0.00564074	0.0234728	0.0279081	0.0115818	0.0442345	0.145029	0.142953	0.145004	0.139281	0.131218	0.143651		0.121275	0.11988	0.121768	0.0831524	0.123812	0.1098			0.141189	0.125703	0.0299338	0.437978	0.0154869	0.00203008	0.0289438	0.145029	0.142953	0.145004	0.139281	0.131218	0.143651		0.137208	0.109628	0.134953	0.12715	0.110092	0.135184	0.125703
Glycan biosynthesis and metabolism	0.129403	0.0420526	0.006073	0.0237399	0.0873508	0.0352345	0.139467	0.107789	0.145737	0.106422	0.133843	0.137991	0.144639		0.0441353	0.139534	0.0153442	0.00389525	0.0209368	0.0284706			0.129403	0.0761209	0.0366953	0.255032	0.0532826	0.00447428	0.102091	0.107789	0.145737	0.106422	0.133843	0.137991	0.144639		0.124949	0.016479	0.0965832	0.0674086	0.0291973	0.122109	0.0761209
Protein export	0.439373	0.618277	0.00650779	0.0246913	-0.178904	-0.284874	-0.0729341	0.479313	0.409711	0.461907	0.420271	0.436198	0.428837		0.651857	0.440798	0.631726	0.699285	0.570017	0.715978			0.439373	0.535913	0.0311893	0.394119	-0.09654	-0.180962	-0.0121178	0.479313	0.409711	0.461907	0.420271	0.436198	0.428837		0.442079	0.624606	0.496739	0.548979	0.633829	0.469245	0.535913
Biosynthesis and biodegradation of secondary metabolites	0.147606	0.073981	0.00722824	0.0266412	0.0736249	0.0273287	0.119921	0.125523	0.165527	0.121782	0.157389	0.161412	0.154002		0.072014	0.157641	0.0587078	0.0317612	0.0733226	0.0504392			0.147606	0.101629	0.0439616	0.210712	0.0459768	0.00164424	0.0903094	0.125523	0.165527	0.121782	0.157389	0.161412	0.154002		0.145286	0.0554988	0.116216	0.108775	0.0459182	0.13808	0.101629
Restriction enzyme	0.0717096	0.134976	0.00910092	0.0266823	-0.0632664	-0.104266	-0.0222671	0.0896977	0.0602462	0.0841127	0.0608975	0.0607385	0.0745651		0.172841	0.081418	0.136634	0.131271	0.104083	0.183609			0.0717096	0.112034	0.0256744	0.475832	-0.0403247	-0.0740025	-0.0066469	0.0896977	0.0602462	0.0841127	0.0608975	0.0607385	0.0745651		0.0644076	0.13351	0.0928621	0.130474	0.150934	0.100018	0.112034
Glutathione metabolism	0.42065	0.291496	0.00934554	0.0267905	0.129154	0.0454126	0.212895	0.415659	0.444692	0.379512	0.428158	0.412065	0.443813		0.294405	0.444354	0.245626	0.285621	0.262074	0.216897			0.42065	0.335159	0.0280579	0.45883	0.0854903	0.0127128	0.158268	0.415659	0.444692	0.379512	0.428158	0.412065	0.443813		0.414771	0.254209	0.374587	0.308895	0.262847	0.395647	0.335159
Chromosome	1.37593	1.54983	0.0094689	0.0265541	-0.173898	-0.284349	-0.0634468	1.37553	1.37027	1.39126	1.37994	1.34758	1.39103		1.58262	1.4317	1.49548	1.63258	1.4576	1.699			1.37593	1.47175	0.0356634	0.254216	-0.0958186	-0.182382	-0.0092552	1.37553	1.37027	1.39126	1.37994	1.34758	1.39103		1.38677	1.52114	1.43861	1.46471	1.6109	1.40839	1.47175
MAPK signaling pathway - yeast	0.028828	0.0541829	0.00969871	0.0260653	-0.0253549	-0.0415743	-0.00913559	0.0317201	0.025031	0.0316863	0.0279961	0.0284405	0.028094		0.0644666	0.043945	0.0606111	0.0272898	0.061608	0.0671772			0.028828	0.0403574	0.0177159	0.547226	-0.0115294	-0.0202292	-0.00282954	0.0317201	0.025031	0.0316863	0.0279961	0.0284405	0.028094		0.030921	0.0494369	0.0395339	0.0332208	0.0511131	0.0379186	0.0403574
RNA degradation	0.37103	0.468384	0.0103606	0.0262061	-0.0973544	-0.160956	-0.0337527	0.391202	0.360802	0.378788	0.360719	0.362426	0.372242		0.509556	0.380508	0.452815	0.496025	0.424735	0.546666			0.37103	0.414642	0.0350488	0.278388	-0.0436125	-0.082986	-0.00423894	0.391202	0.360802	0.378788	0.360719	0.362426	0.372242		0.371197	0.442691	0.402062	0.401451	0.475199	0.395253	0.414642
Biosynthesis of siderophore group nonribosomal peptides	0.12995	0.0540007	0.0113375	0.0281257	0.0759488	0.0237025	0.128195	0.102675	0.147305	0.108143	0.146851	0.140968	0.133754		0.0395195	0.146988	0.0435494	0.0147051	0.0657731	0.0134689			0.12995	0.0847168	0.0479375	0.198905	0.0452327	0.000539475	0.0899259	0.102675	0.147305	0.108143	0.146851	0.140968	0.133754		0.134285	0.0450748	0.101617	0.0866941	0.025029	0.115601	0.0847168
Lipopolysaccharide biosynthesis proteins	0.783448	0.392416	0.0122793	0.0282862	0.391032	0.117386	0.664678	0.669202	0.87569	0.647349	0.798121	0.827842	0.882483		0.454604	0.870678	0.227703	0.182877	0.209252	0.409384			0.783448	0.518394	0.0464487	0.201761	0.265054	0.00557662	0.524531	0.669202	0.87569	0.647349	0.798121	0.827842	0.882483		0.760668	0.200325	0.63103	0.419446	0.306764	0.79213	0.518394
Tuberculosis	0.0847363	0.134678	0.0125894	0.0280005	-0.0499422	-0.0844108	-0.0154735	0.0999749	0.0793905	0.0897556	0.0796619	0.0788071	0.0808275		0.155767	0.0936201	0.122072	0.174387	0.103453	0.158771			0.0847363	0.114078	0.0449549	0.208291	-0.0293412	-0.0577688	-0.000913714	0.0999749	0.0793905	0.0897556	0.0796619	0.0788071	0.0808275		0.082222	0.136615	0.0948939	0.124902	0.150435	0.0953966	0.114078
Ribosome	1.43579	2.31492	0.0131086	0.0286612	-0.879138	-1.48859	-0.269681	1.61879	1.31052	1.56939	1.35068	1.38001	1.38533		2.44264	1.44552	2.23541	3.00352	1.91554	2.84691			1.43579	1.95358	0.0426937	0.219793	-0.517798	-1.01162	-0.0239732	1.61879	1.31052	1.56939	1.35068	1.38001	1.38533		1.42581	2.35497	1.68638	2.04609	2.62743	1.58083	1.95358
Biosynthesis of vancomycin group antibiotics	0.0271515	0.054402	0.0146881	0.0300756	-0.0272505	-0.046849	-0.00765198	0.0366783	0.0245949	0.0299653	0.0241918	0.0217386	0.0257398		0.0692667	0.0303471	0.0480316	0.0614788	0.0383341	0.0789534			0.0271515	0.0418425	0.0467756	0.200056	-0.014691	-0.0290999	-0.000282163	0.0366783	0.0245949	0.0299653	0.0241918	0.0217386	0.0257398		0.025596	0.0459317	0.0331703	0.0441227	0.0653007	0.0369335	0.0418425
Aminoacyl-tRNA biosynthesis	0.699003	1.13139	0.0148062	0.0298438	-0.432385	-0.741559	-0.123211	0.791978	0.633967	0.772754	0.659684	0.667191	0.668445		1.14203	0.73817	1.08375	1.57651	0.922651	1.32522			0.699003	0.95524	0.0481754	0.194098	-0.256236	-0.509594	-0.00287848	0.791978	0.633967	0.772754	0.659684	0.667191	0.668445		0.687602	1.17485	0.808085	1.02701	1.28014	0.753746	0.95524
Photosynthesis proteins	0.233965	0.371808	0.0158785	0.0315127	-0.137843	-0.238112	-0.0375735	0.269078	0.215874	0.249945	0.219969	0.220653	0.22827		0.466392	0.23044	0.348091	0.458487	0.297581	0.429856			0.233965	0.318838	0.0424245	0.226808	-0.0848735	-0.165673	-0.0040737	0.269078	0.215874	0.249945	0.219969	0.220653	0.22827		0.229783	0.388906	0.271338	0.358012	0.412427	0.252564	0.318838
Photosynthesis	0.212274	0.354928	0.0165882	0.0305697	-0.142654	-0.247596	-0.0377118	0.248733	0.192956	0.230243	0.196953	0.199553	0.205205		0.435268	0.210349	0.329374	0.456658	0.272043	0.425875			0.212274	0.302426	0.0438373	0.213803	-0.0901525	-0.176806	-0.00349893	0.248733	0.192956	0.230243	0.196953	0.199553	0.205205		0.206844	0.375131	0.248983	0.346199	0.403948	0.233452	0.302426
Histidine metabolism	0.464198	0.655619	0.017387	0.030725	-0.191421	-0.33473	-0.0481115	0.502641	0.435099	0.514765	0.469056	0.423217	0.440411		0.71062	0.47512	0.782477	0.493897	0.774328	0.697271			0.464198	0.594032	0.0197998	0.500395	-0.129834	-0.231393	-0.0282749	0.502641	0.435099	0.514765	0.469056	0.423217	0.440411		0.488092	0.701901	0.573575	0.638079	0.683611	0.478936	0.594032
RNA polymerase	0.10612	0.172371	0.0176977	0.0308514	-0.066251	-0.115613	-0.0168891	0.1158	0.0966648	0.117402	0.10131	0.103976	0.101565		0.169295	0.100759	0.167339	0.242274	0.154762	0.199795			0.10612	0.143869	0.0353293	0.272821	-0.0377495	-0.0718272	-0.00367171	0.1158	0.0966648	0.117402	0.10131	0.103976	0.101565		0.108139	0.183172	0.127693	0.151515	0.1791	0.113595	0.143869
Cell motility and secretion	0.236914	0.169937	0.0183565	0.0315732	0.0669769	0.0156832	0.118271	0.237233	0.258465	0.213292	0.234075	0.222855	0.255564		0.204782	0.215891	0.118181	0.205503	0.101877	0.173388			0.236914	0.19459	0.0456005	0.207819	0.0423242	0.00109289	0.0835555	0.237233	0.258465	0.213292	0.234075	0.222855	0.255564		0.229402	0.138392	0.207355	0.170342	0.180327	0.241722	0.19459
Peptidoglycan biosynthesis	0.6278	0.77822	0.0278202	0.0417302	-0.150419	-0.277062	-0.0237771	0.649071	0.604466	0.662284	0.610987	0.610685	0.62931		0.783347	0.629294	0.743443	0.954566	0.682765	0.875904			0.6278	0.724405	0.0339938	0.315009	-0.0966044	-0.182948	-0.0102607	0.649071	0.604466	0.662284	0.610987	0.610685	0.62931		0.631914	0.807602	0.674884	0.727398	0.837459	0.667173	0.724405
Pyrimidine metabolism	1.32049	1.7448	0.028555	0.041859	-0.424314	-0.783923	-0.0647041	1.4047	1.26332	1.39087	1.27171	1.28476	1.30756		1.82323	1.29412	1.63086	2.14388	1.46863	2.10807			1.32049	1.58485	0.0459211	0.205904	-0.264359	-0.521963	-0.00675528	1.4047	1.26332	1.39087	1.27171	1.28476	1.30756		1.31198	1.74631	1.43458	1.61944	1.97476	1.42201	1.58485
DNA replication proteins	0.895727	1.13049	0.0346757	0.0502603	-0.234767	-0.445101	-0.0244325	0.949667	0.86899	0.930439	0.861493	0.860929	0.902844		1.22297	0.849569	1.08428	1.3073	0.960345	1.3585			0.895727	1.0609	0.0373465	0.247198	-0.165177	-0.316682	-0.0136712	0.949667	0.86899	0.930439	0.861493	0.860929	0.902844		0.898137	1.14292	0.975991	1.07669	1.29837	0.973323	1.0609
Carbon fixation in photosynthetic organisms	0.502019	0.550942	0.0366017	0.0513219	-0.0489227	-0.0934308	-0.00441473	0.499498	0.507395	0.505814	0.511475	0.492626	0.495309		0.57527	0.516709	0.533343	0.578855	0.495153	0.606324			0.502019	0.538829	0.0345424	0.309767	-0.03681	-0.0697988	-0.00382121	0.499498	0.507395	0.505814	0.511475	0.492626	0.495309		0.508441	0.547613	0.504523	0.567017	0.581071	0.524311	0.538829
Fluorobenzoate degradation	0.034072	0.0121177	0.0373634	0.0512753	0.0219543	0.00180296	0.0421056	0.0330857	0.0380496	0.0243704	0.0393705	0.0369032	0.0326525		0.0147814	0.0497816	0.00108113	0.000914269	0.00582818	0.000319649			0.034072	0.0174351	0.0179211	0.498205	0.0166369	0.0038516	0.0294221	0.0330857	0.0380496	0.0243704	0.0393705	0.0369032	0.0326525		0.0307758	0.00178417	0.0211053	0.0208929	0.00348391	0.0265687	0.0174351
Translation factors	0.368835	0.513991	0.0385833	0.0523921	-0.145157	-0.279199	-0.0111148	0.397087	0.357825	0.381133	0.35445	0.352415	0.370098		0.552474	0.363086	0.468244	0.668669	0.390144	0.641333			0.368835	0.45345	0.043567	0.216279	-0.0846156	-0.165756	-0.00347552	0.397087	0.357825	0.381133	0.35445	0.352415	0.370098		0.365969	0.500416	0.402981	0.471312	0.5756	0.404424	0.45345
DNA repair and recombination proteins	2.3328	2.75091	0.0389871	0.0518489	-0.418109	-0.80593	-0.0302874	2.45005	2.2716	2.39317	2.26591	2.26568	2.3504		2.83003	2.33342	2.5991	3.25996	2.40721	3.07572			2.3328	2.60855	0.0481462	0.196833	-0.275751	-0.548381	-0.00312095	2.45005	2.2716	2.39317	2.26591	2.26568	2.3504		2.31814	2.7644	2.45843	2.66318	3.02195	2.42519	2.60855
Nucleotide metabolism	0.109556	0.0757207	0.0402376	0.0513925	0.0338357	0.00192028	0.0657511	0.0918859	0.107851	0.0989144	0.1055	0.141791	0.111396		0.0584127	0.117949	0.0486848	0.101622	0.0477649	0.0798905			0.109556	0.0831967	0.0167725	0.666108	0.0263597	0.00591245	0.046807	0.0918859	0.107851	0.0989144	0.1055	0.141791	0.111396		0.0956675	0.0669414	0.082806	0.0869582	0.0663653	0.100442	0.0831967
DNA replication	0.485282	0.632969	0.0422334	0.0534128	-0.147687	-0.287963	-0.00741094	0.5259	0.46496	0.513333	0.461633	0.462135	0.483735		0.684548	0.435294	0.608898	0.762608	0.531063	0.775404			0.485282	0.589821	0.0377043	0.243763	-0.104539	-0.2008	-0.00827707	0.5259	0.46496	0.513333	0.461633	0.462135	0.483735		0.486579	0.649451	0.533841	0.611001	0.73231	0.525744	0.589821
